# Supplementary material
Source: ML conference proceedings conference paper supplement (https://openreview.net/forum?id=pGRjDetCDM)

SCGN

ZIC1

CCK

PENK

SLC1A3

CENPV.L

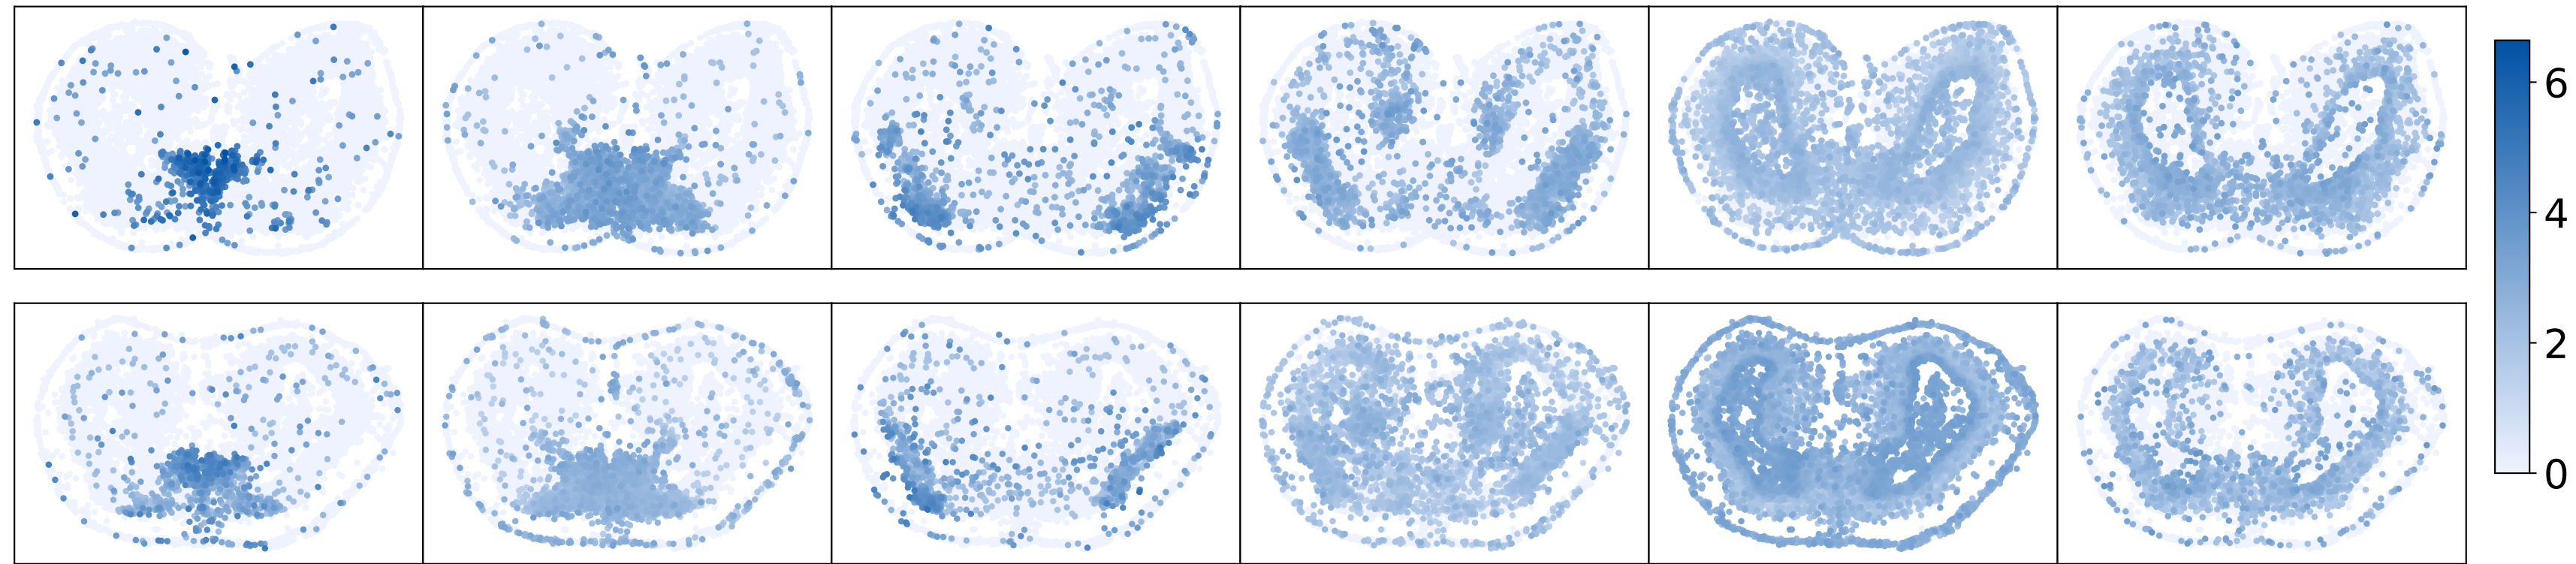

Supplement: supplementary_material [file marker_genes.pdf › JADE-main/fig/ab/marker_genes.pdf]

**JADE (1.85)**

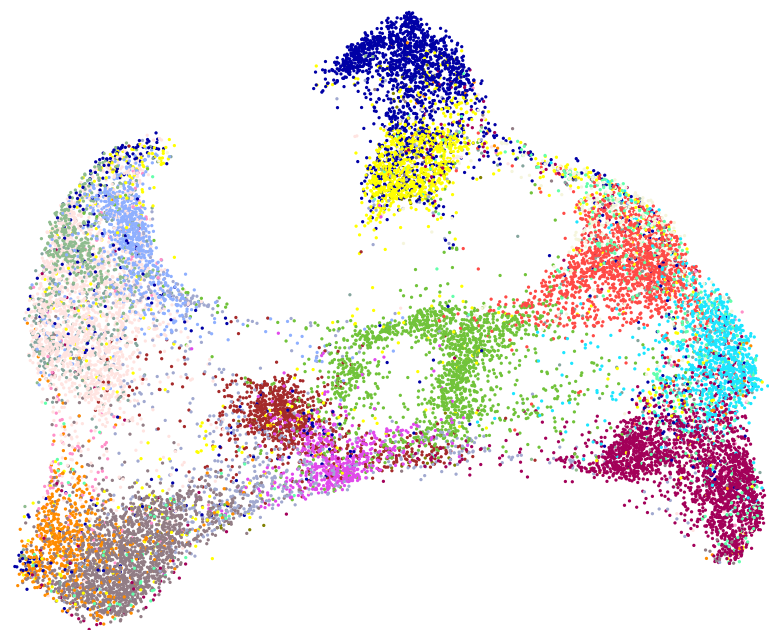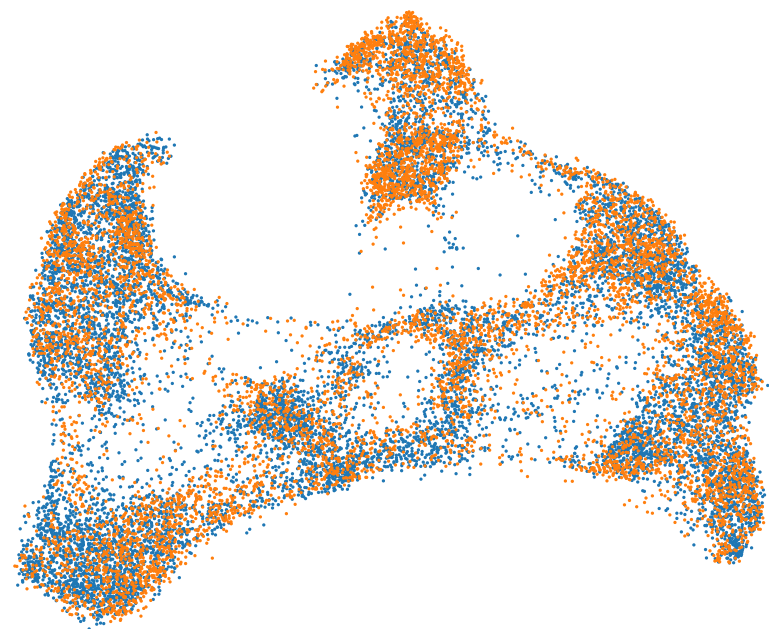

STAligner (1.25)

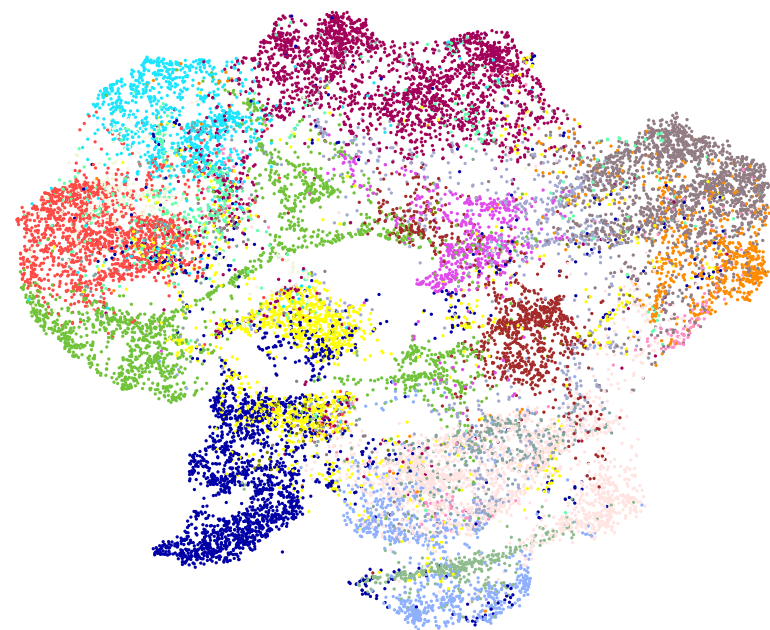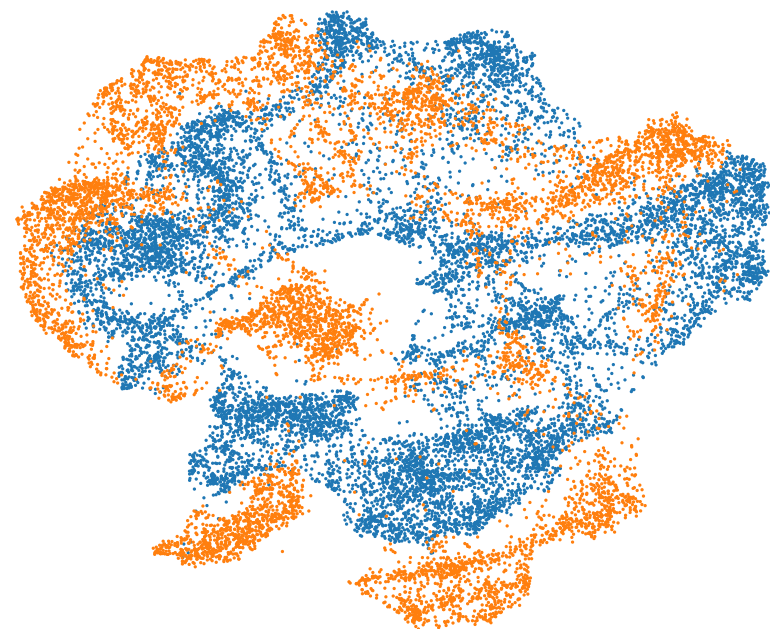

STAGATE (1.23)

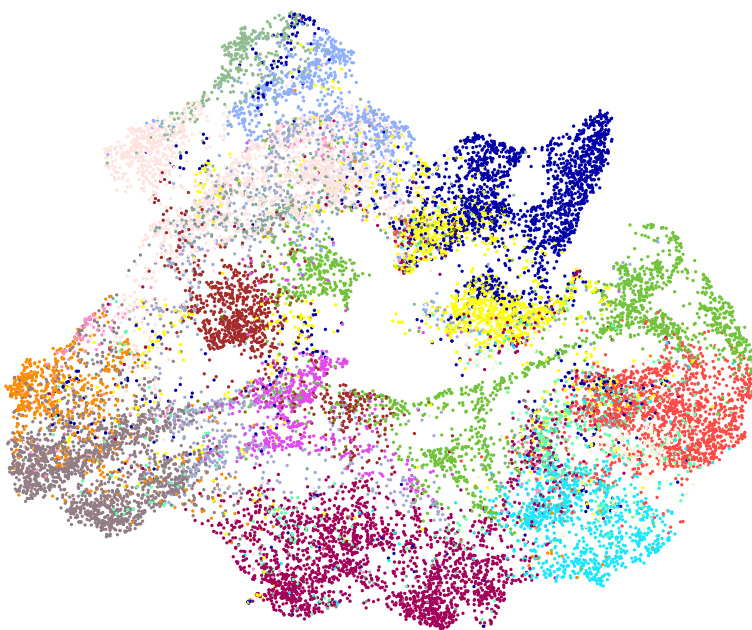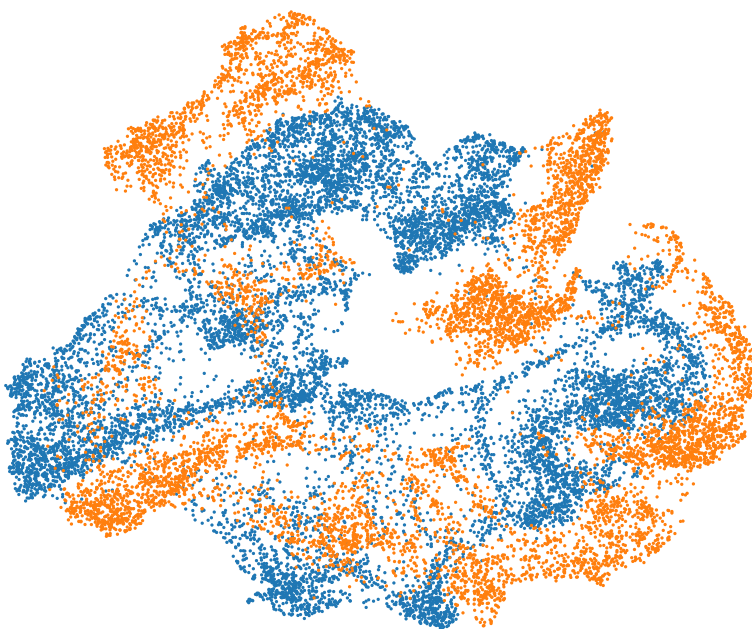

GraphST (1.78)

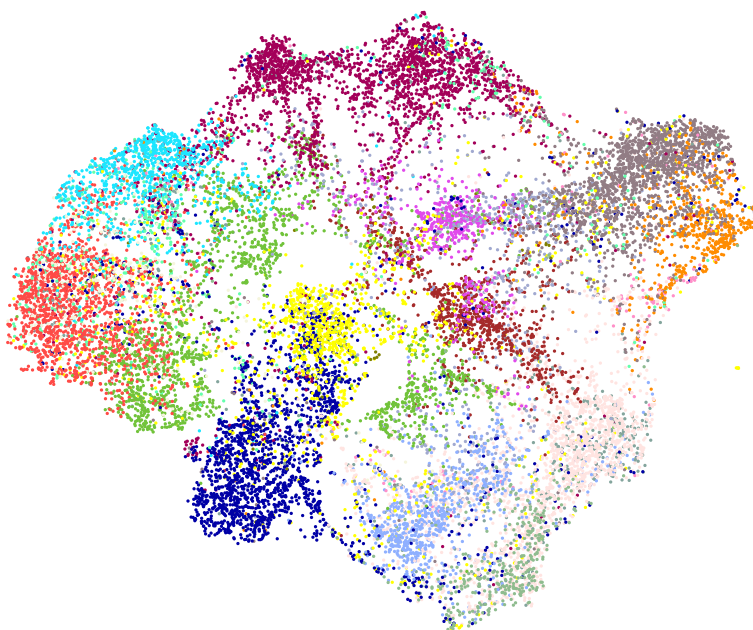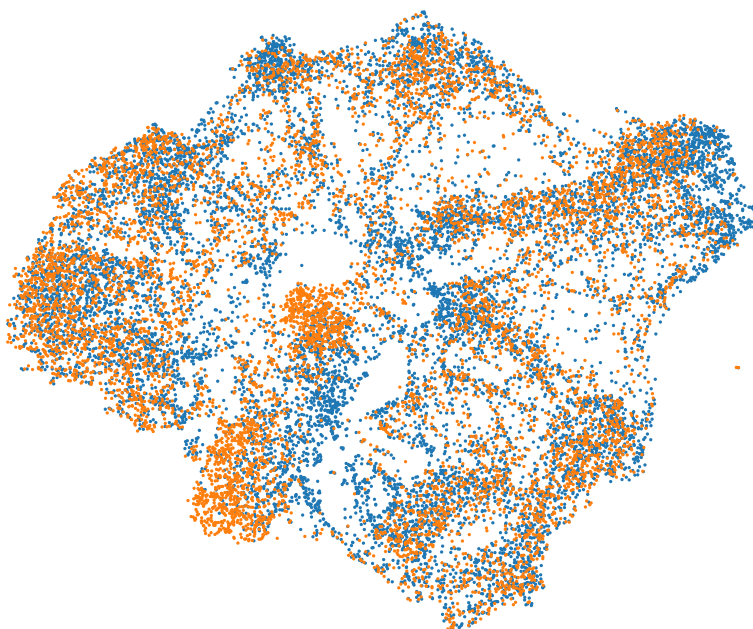

Sample

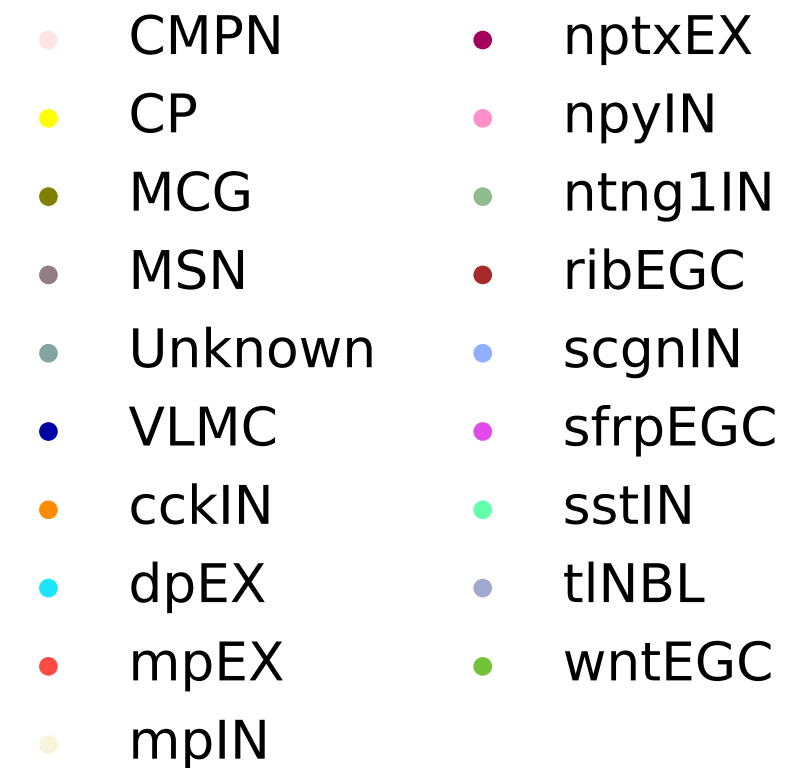

Cluster

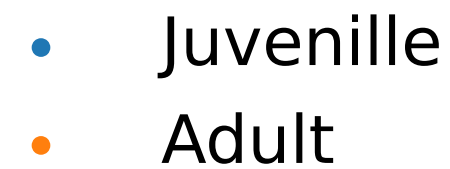

Supplement: supplementary_material [file umap_all.pdf › JADE-main/fig/ab/umap_all.pdf]

### ARI for Slice A of Sample III

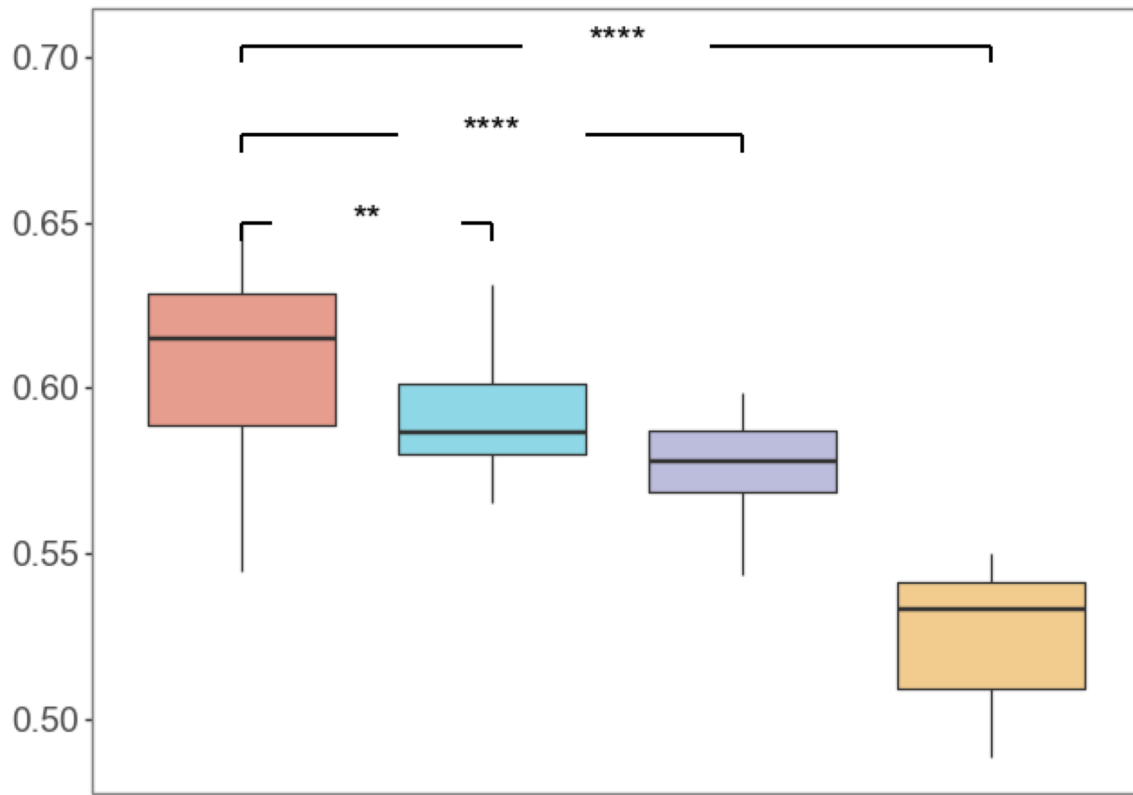

### ARI for Slice B of Sample III

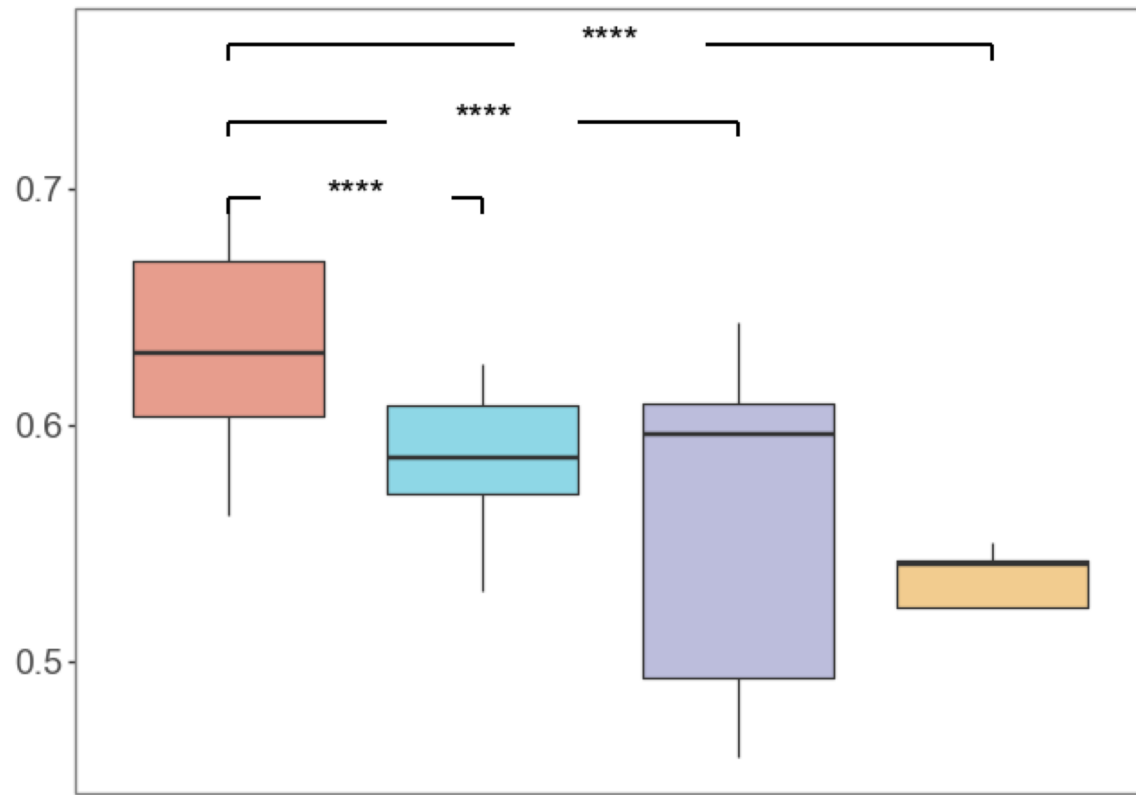

■ JADE
 ■ GraphST
 ■ STAligner
 ■ STAGATE

Supplement: supplementary_material [file ARI_all.pdf › JADE-main/fig/dlpfc/ARI_all.pdf]

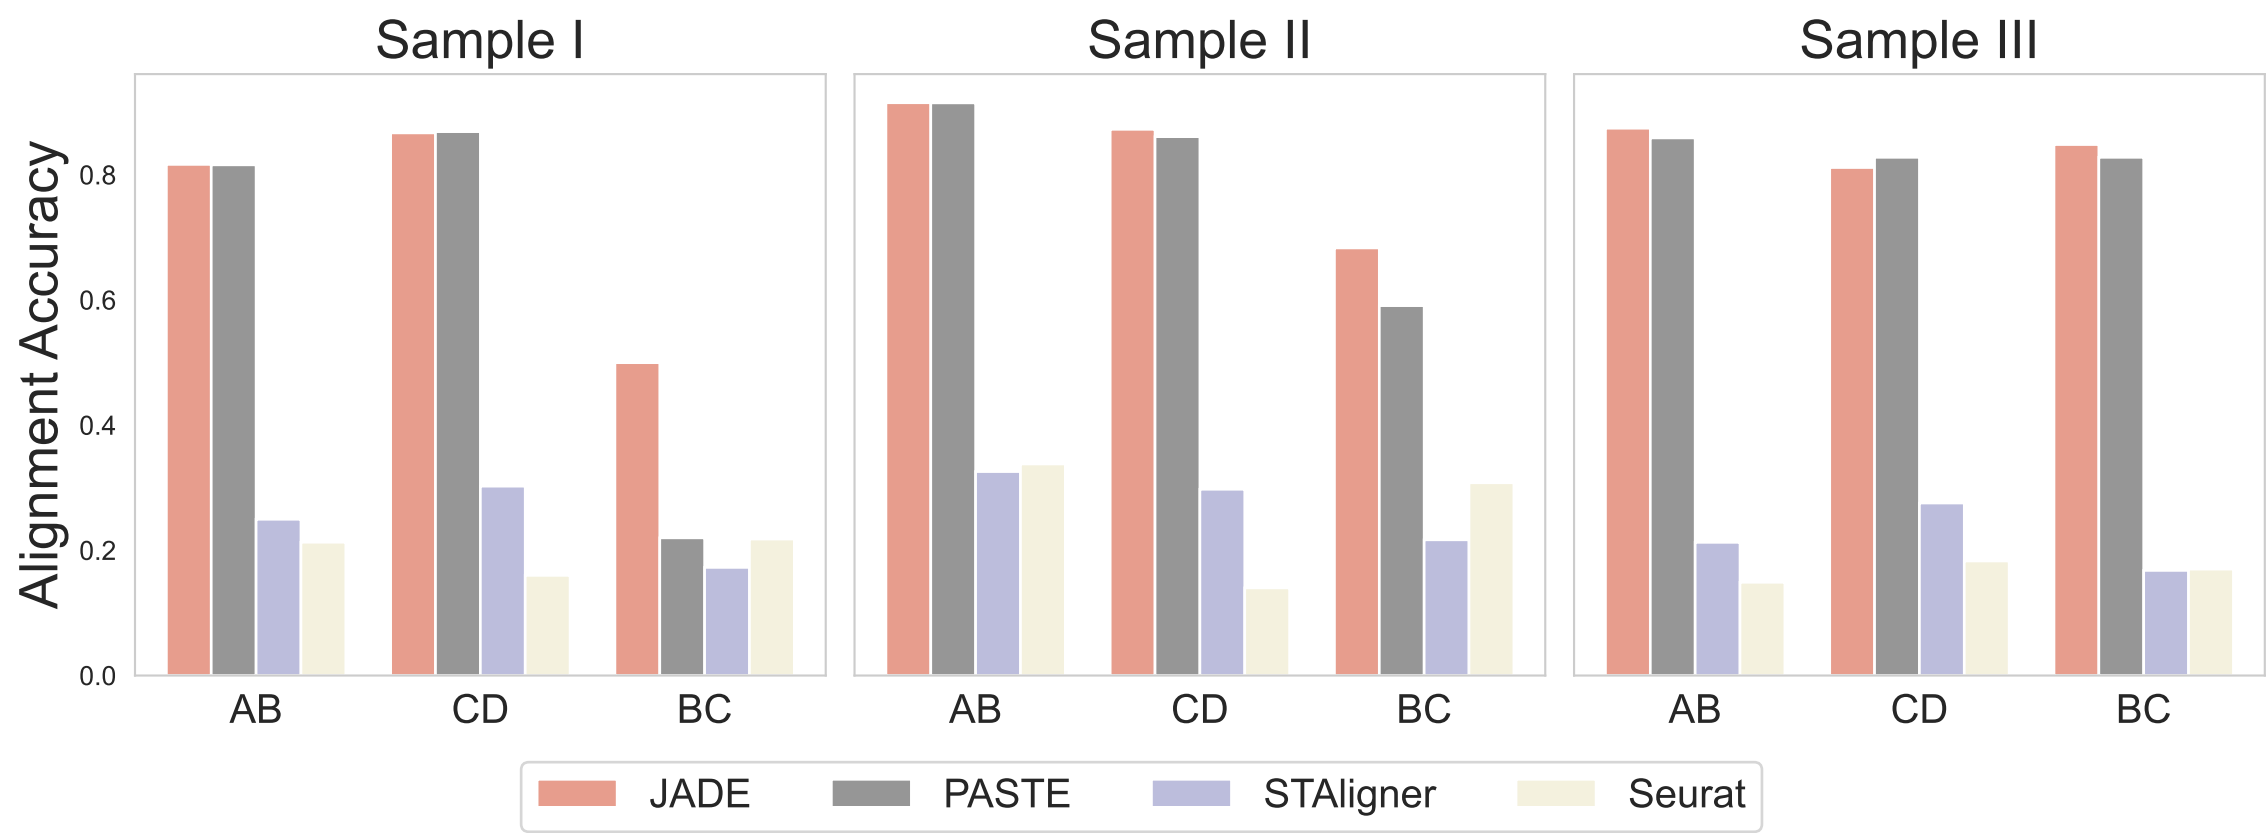

Supplement: supplementary_material [file Alignment_all.pdf › JADE-main/fig/dlpfc/Alignment_all.pdf]

MBP

GFAP

CCK

TMSB10

SNAP25

NEFL

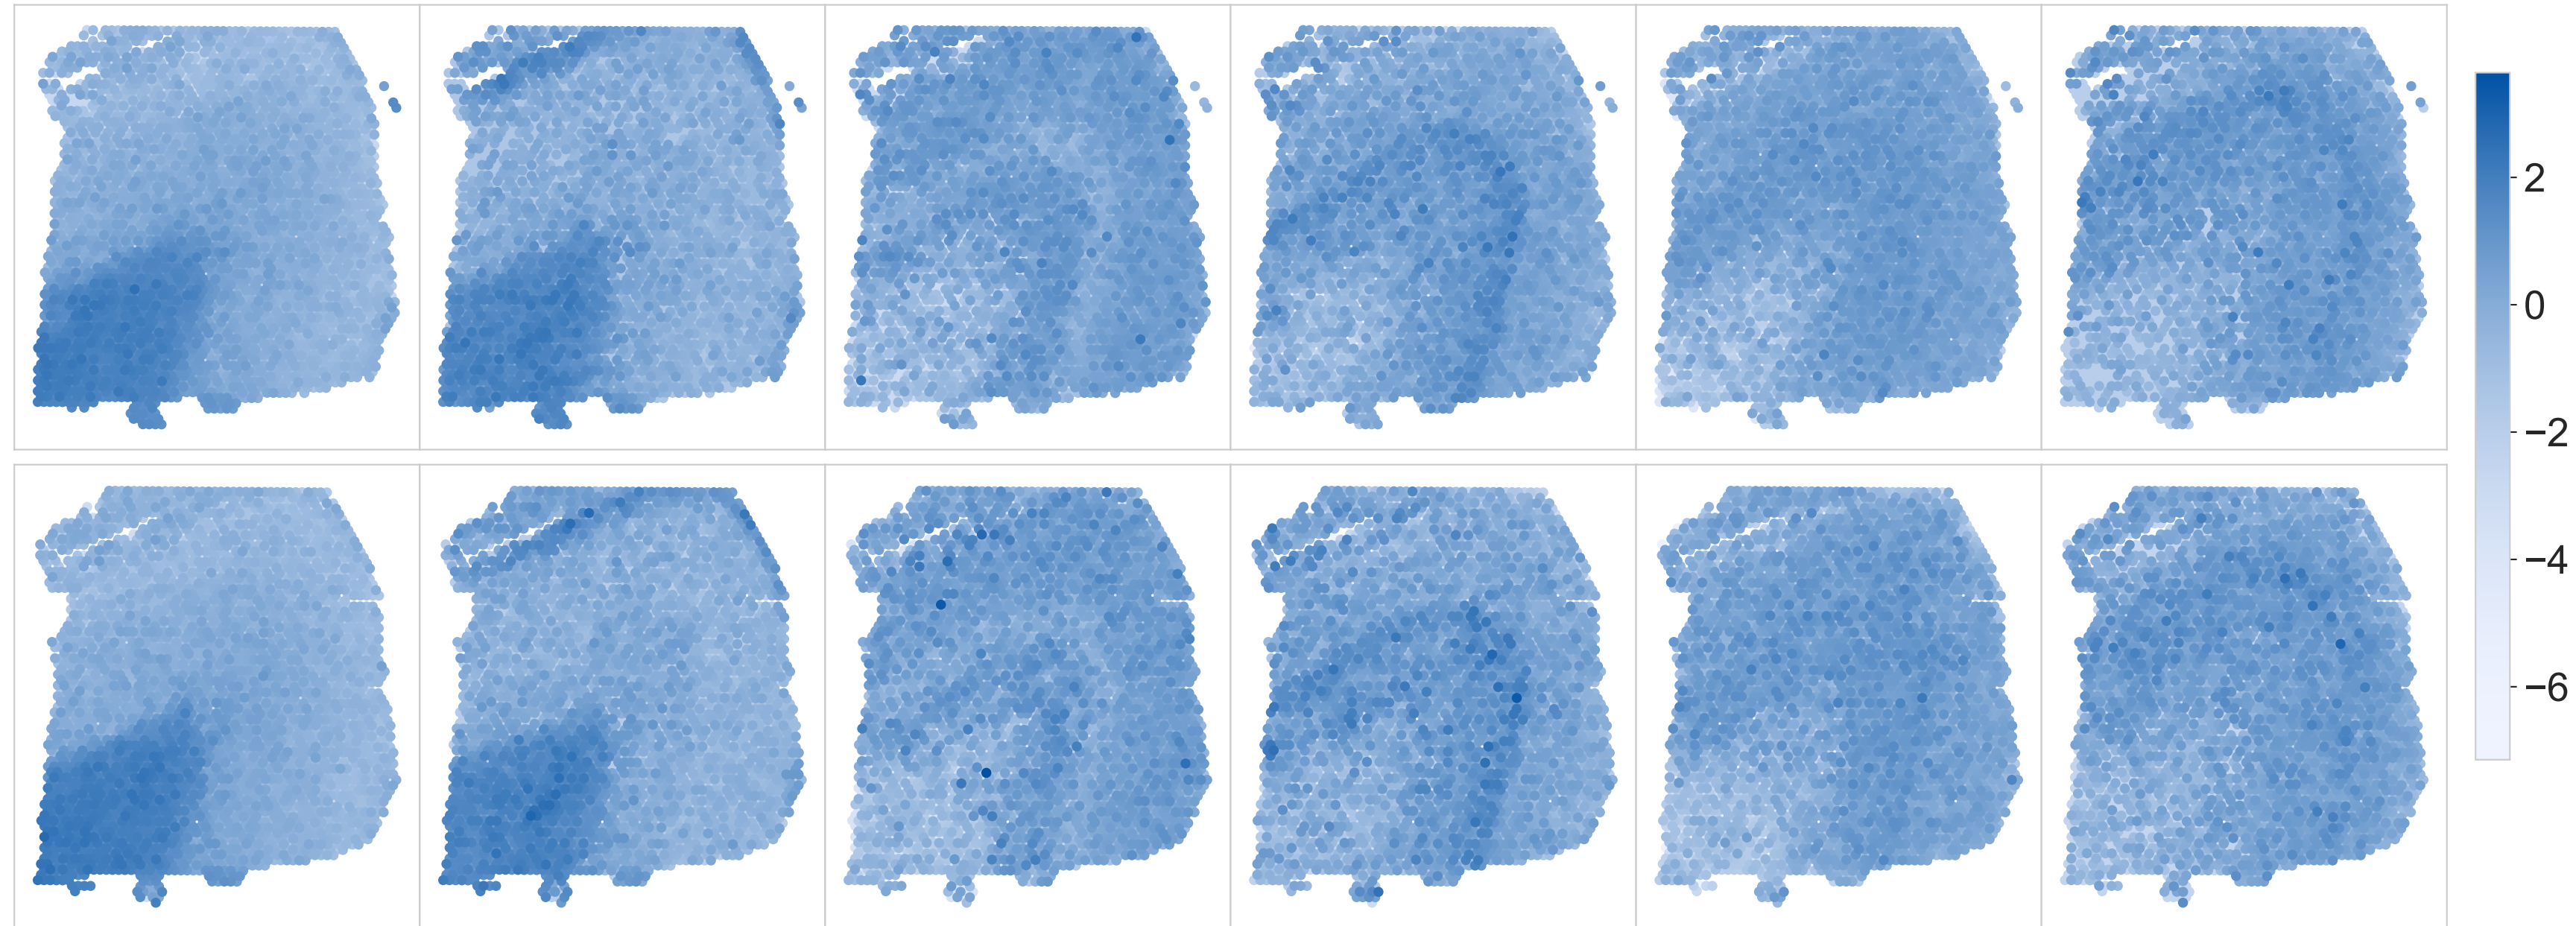

Supplement: supplementary_material [file marker_genes.pdf › JADE-main/fig/dlpfc/marker_genes.pdf]

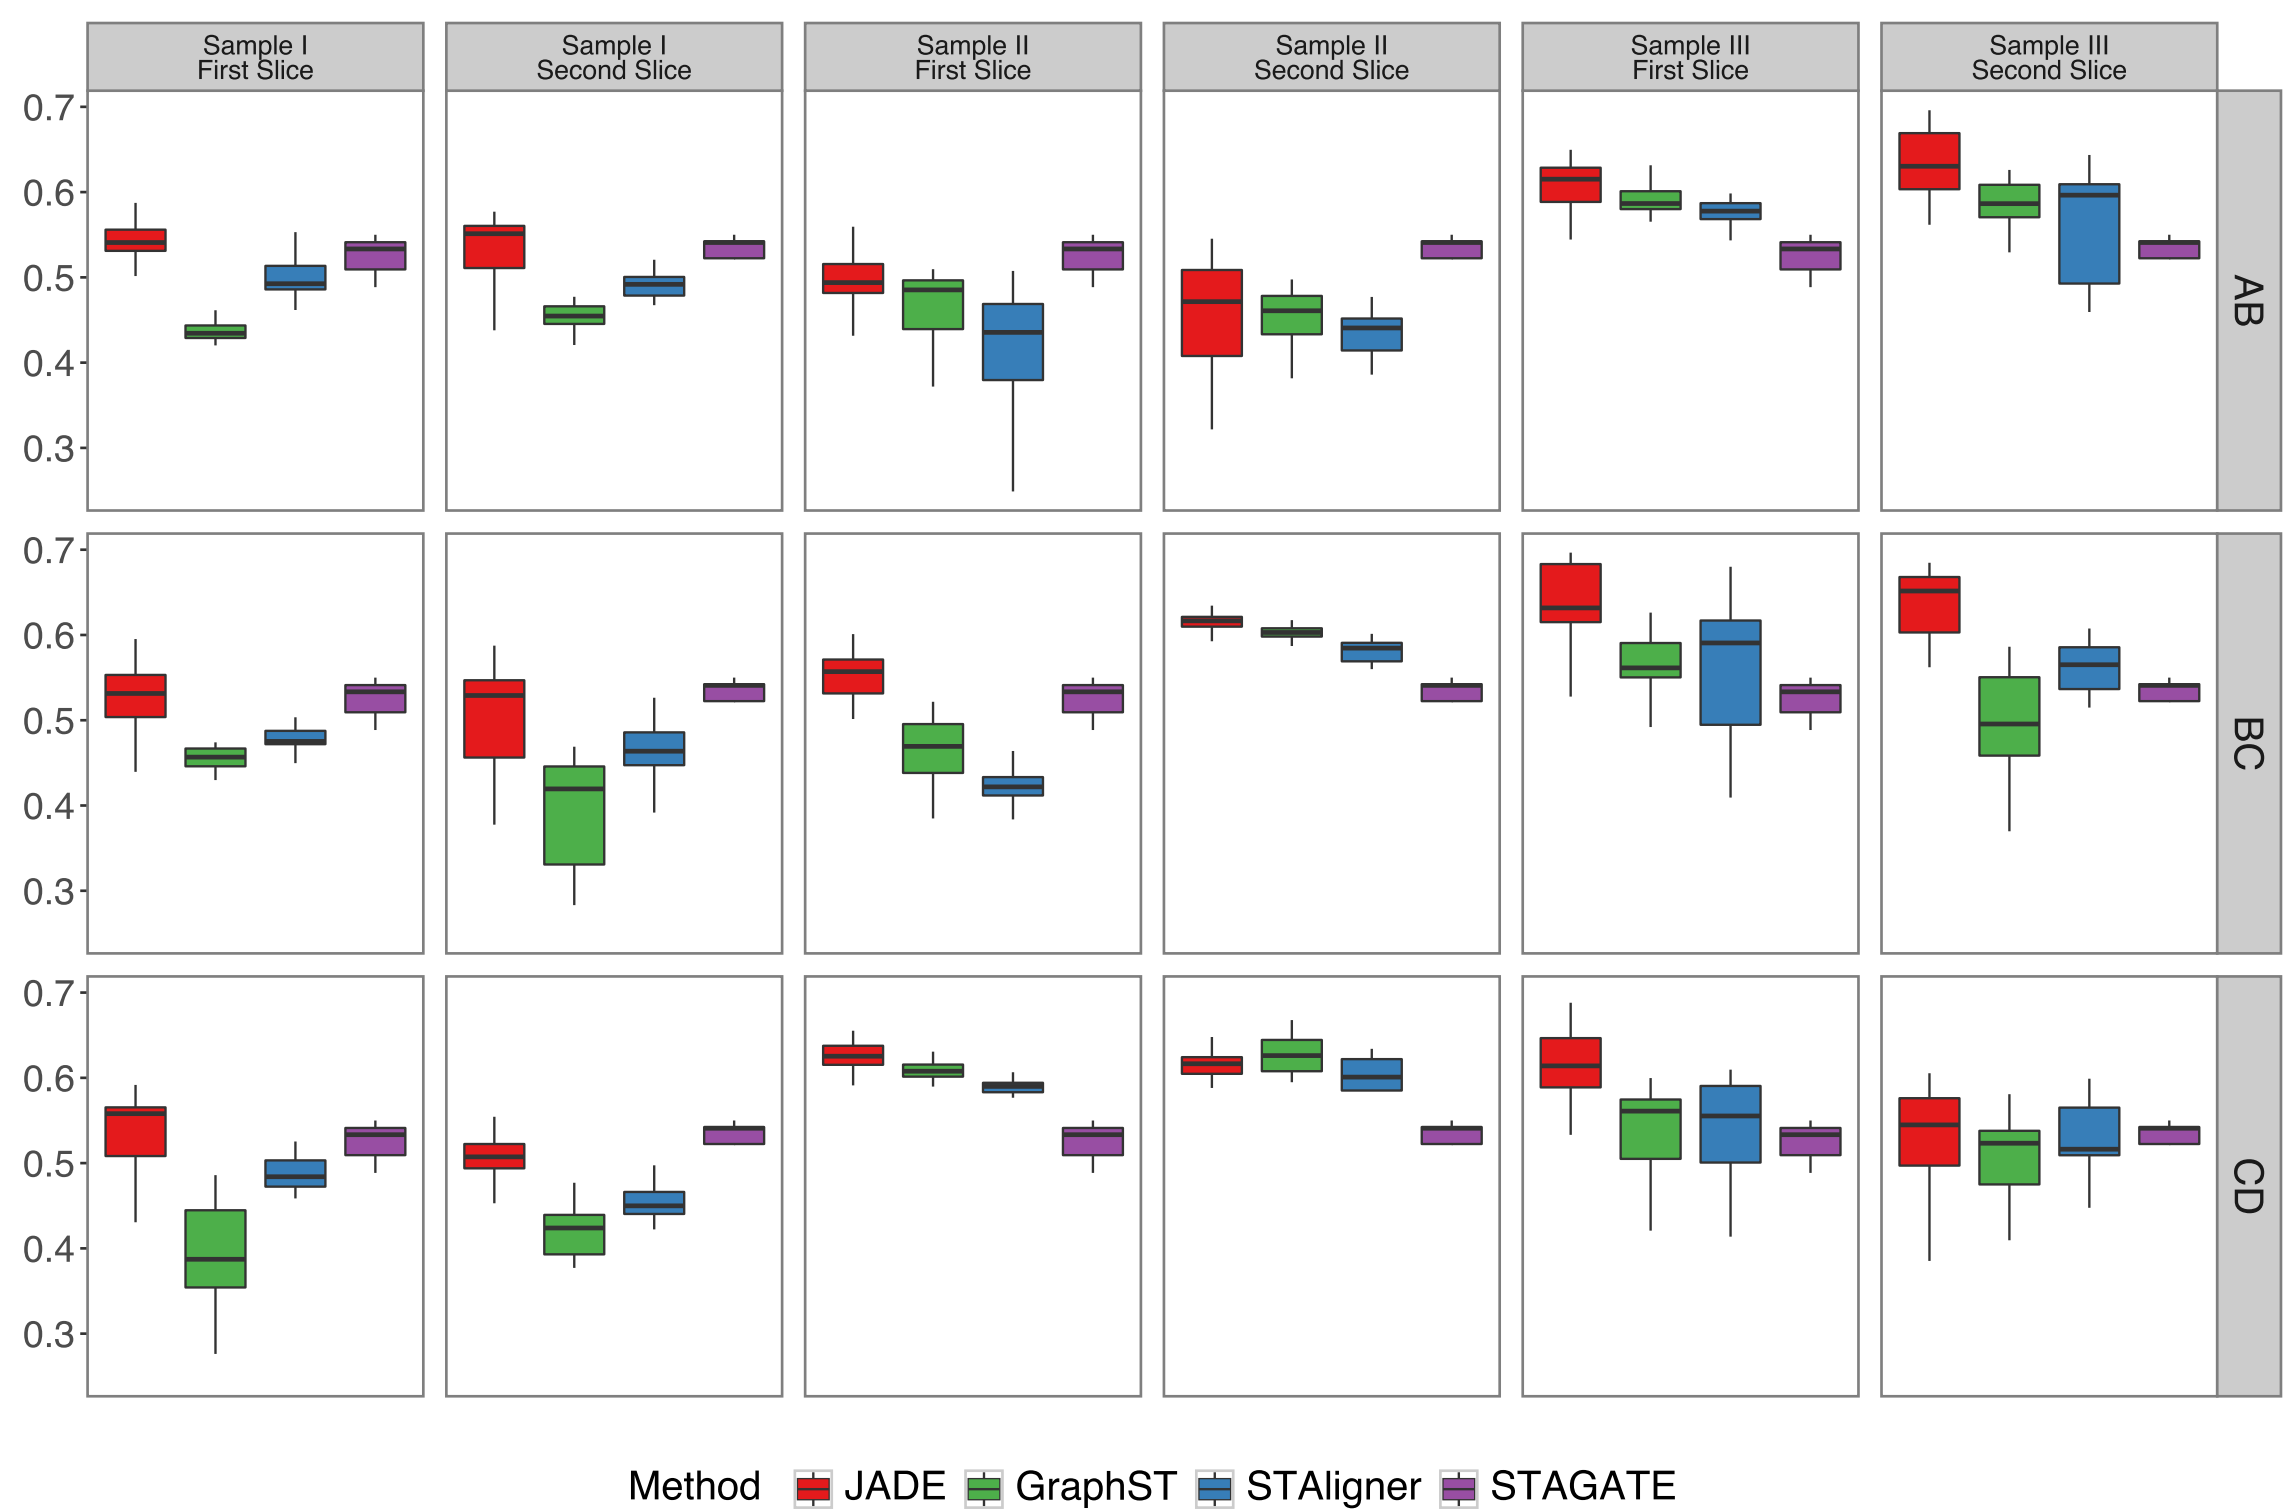

Supplement: supplementary_material [file ari_dlpfc_all.pdf › JADE-main/fig/supp/ari_dlpfc_all.pdf]
